# Supplementary material for: Dissecting Disease-Suppressive Rhizosphere Microbiomes by Functional Amplicon Sequencing and 10× Metagenomics
Source: PubMed Central journal article supplement (PMC8269251; doi:10.1128/msystems.01116-20), 2021-06-08

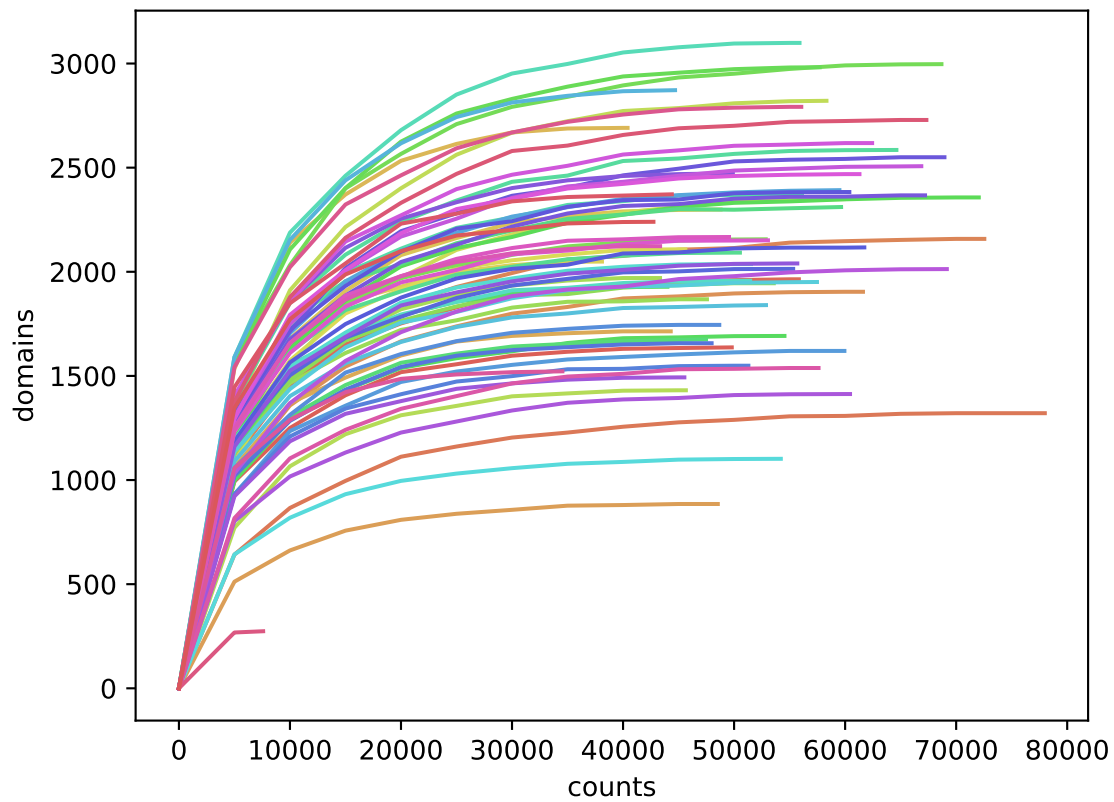

Supplement: msystems.0116-20-sf001.pdf [file msystems.0116-20-sf001.pdf]
