# Supplementary material for: Dissecting Disease-Suppressive Rhizosphere Microbiomes by Functional Amplicon Sequencing and 10× Metagenomics
Source: PubMed Central journal article supplement (PMC8269251; doi:10.1128/msystems.01116-20), 2021-06-08
Supplement: msystems.0116-20-sf002.pdf [file msystems.0116-20-sf002.pdf]

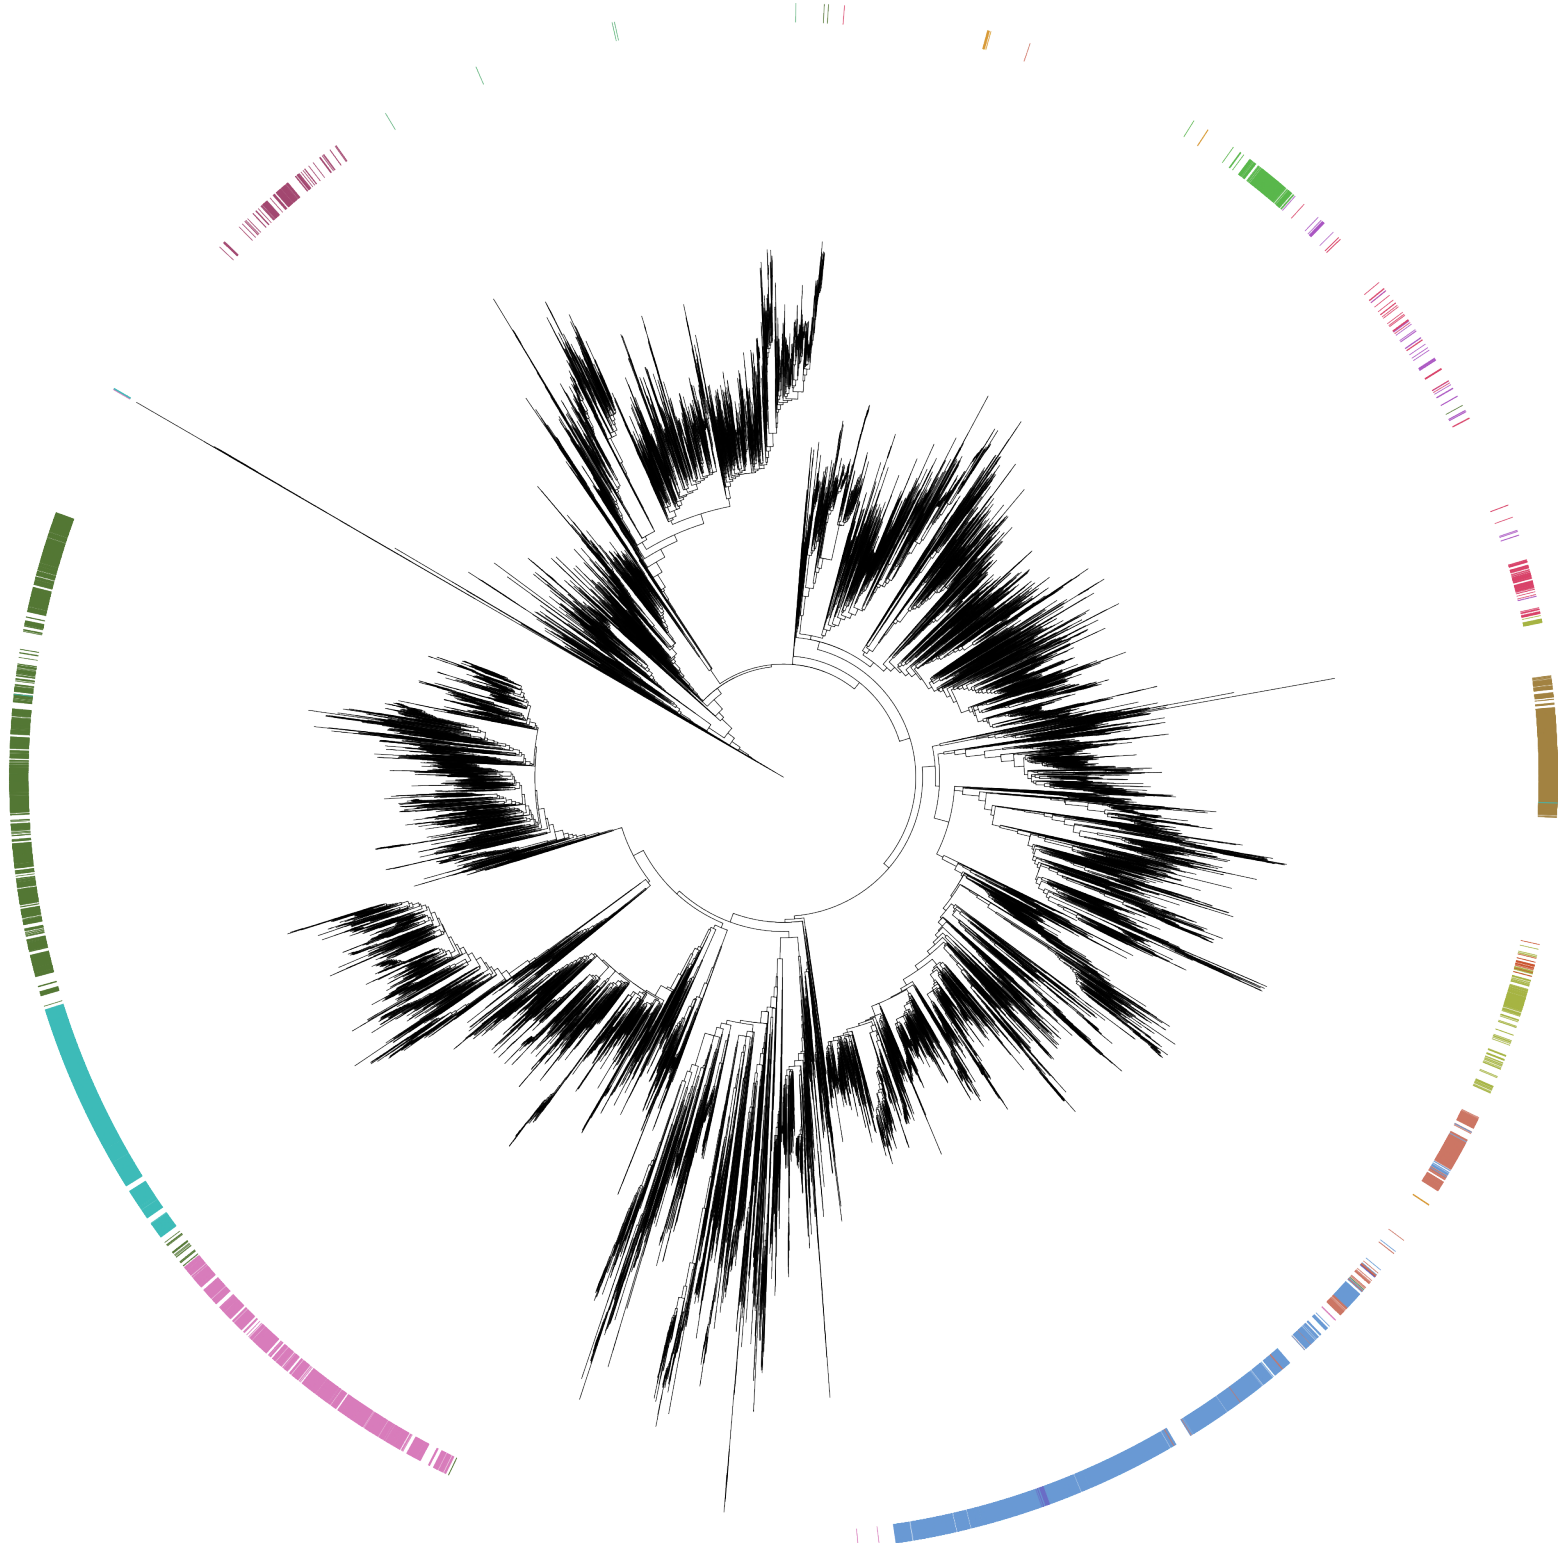

|                                                                                    |     |                                                                                     |     |                                                                                     |     |                                                                                       |     |                                                                                       |     |
|------------------------------------------------------------------------------------|-----|-------------------------------------------------------------------------------------|-----|-------------------------------------------------------------------------------------|-----|---------------------------------------------------------------------------------------|-----|---------------------------------------------------------------------------------------|-----|
|  | Thr |  | Phe |  | Dab |  | Val |  | Leu |
|  | Tyr |  | Asn |  | Ser |  | Ala |  | Cys |
|  | Pro |  | Glu |  | Asp |  | Gly |  | Gln |
